# Supplementary material for: Modulation of MoTe2/MoS2 van der Waals heterojunctions for multifunctional devices using N2O plasma with an opposite doping effect
Source: Royal Society of Chemistry journal article supplement (doi:10.1039/d0nr08814e), 2021-01-01
Supplement: d0nr08814e1.pdf [file d0nr08814e1.pdf]

Supporting information for  
Modulation of MoTe<sub>2</sub>/MoS<sub>2</sub> van der Waals heterojunction for  
multifunctional devices using N<sub>2</sub>O plasma with opposite doping effect

Yuan Xie<sup>1</sup>, Enxiu Wu\*<sup>1</sup>, Shuangqing Fan<sup>2</sup>, Guangyu Geng<sup>1</sup>, Xiaodong Hu<sup>1</sup>, Linyan Xu<sup>1</sup>, Sen Wu\*<sup>1</sup>, Jing Liu\*<sup>1</sup>, Daihua Zhang<sup>1</sup>

<sup>1</sup>State Key Laboratory of Precision Measurement Technology and Instruments,  
School of Precision Instruments and Opto-electronics Engineering, Tianjin University,  
NO. 92 Weijin Road, Tianjin, China, 300072

<sup>2</sup>School of Electronic and Information Engineering, Qingdao University,  
Qingdao 266071, China.

\*Corresponding author emails:

enxiuwu@tju.edu.cn; senwu@tju.edu.cn; jingliu\_1112@tju.edu.cn

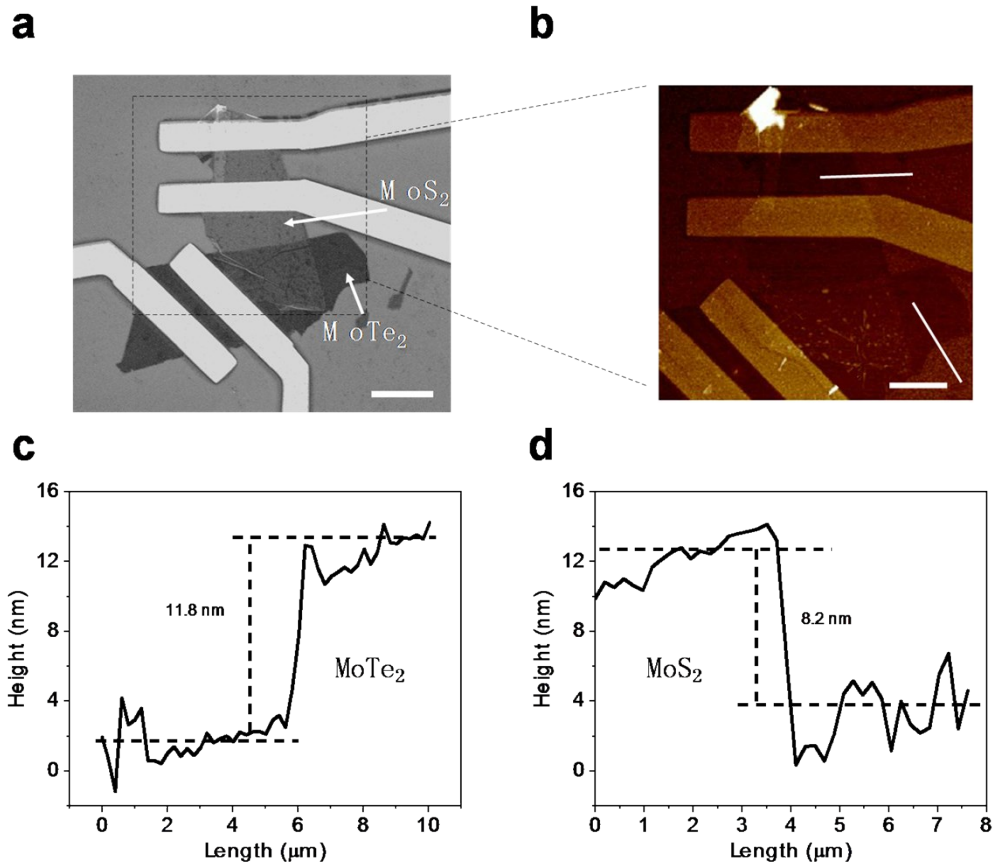

Figure S1: The AFM image of MoTe<sub>2</sub>/MoS<sub>2</sub> heterojunction. (a) The SEM photograph of the MoTe<sub>2</sub>/MoS<sub>2</sub> heterojunction. The dotted area is scanned by atomic force microscopy. Scale bar is 4 μm. (b) The atomic force microscopy image of MoTe<sub>2</sub>/MoS<sub>2</sub> heterojunction. Scale bar is 4 μm. (c)-(d) The thickness data of the multilayer MoTe<sub>2</sub> and MoS<sub>2</sub> nanoflakes in Fig. S1b, respectively.

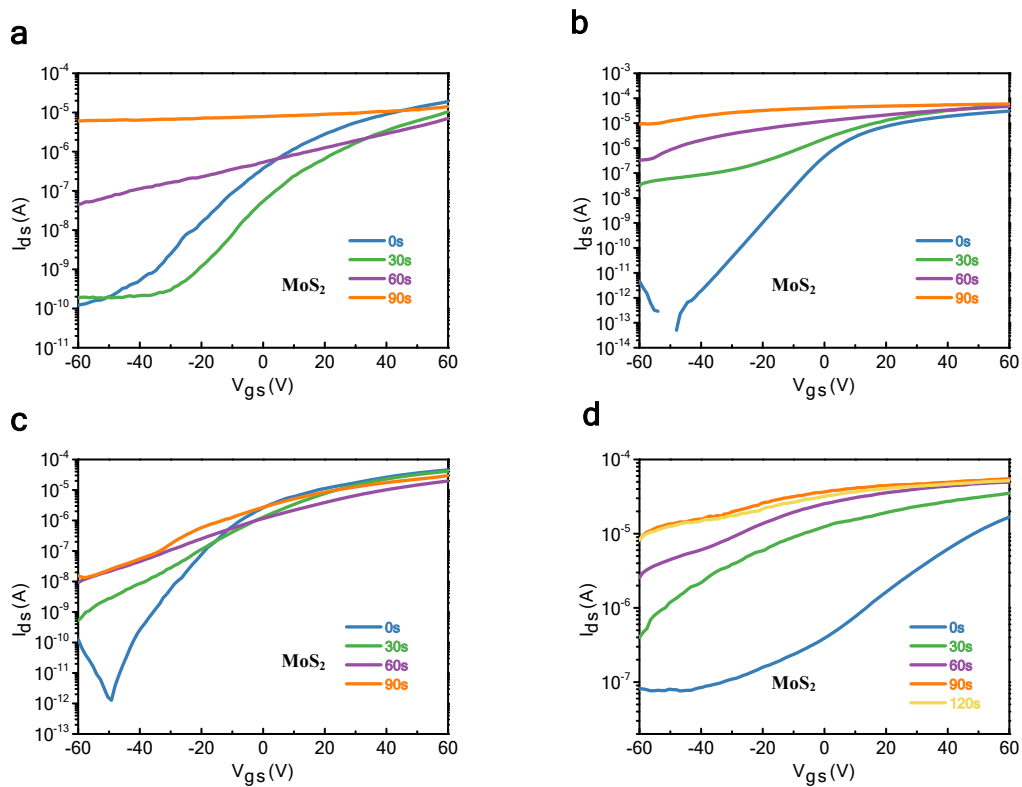

Figure S2: Transfer curve evolution of four MoS<sub>2</sub> devices under different plasma treatment times.

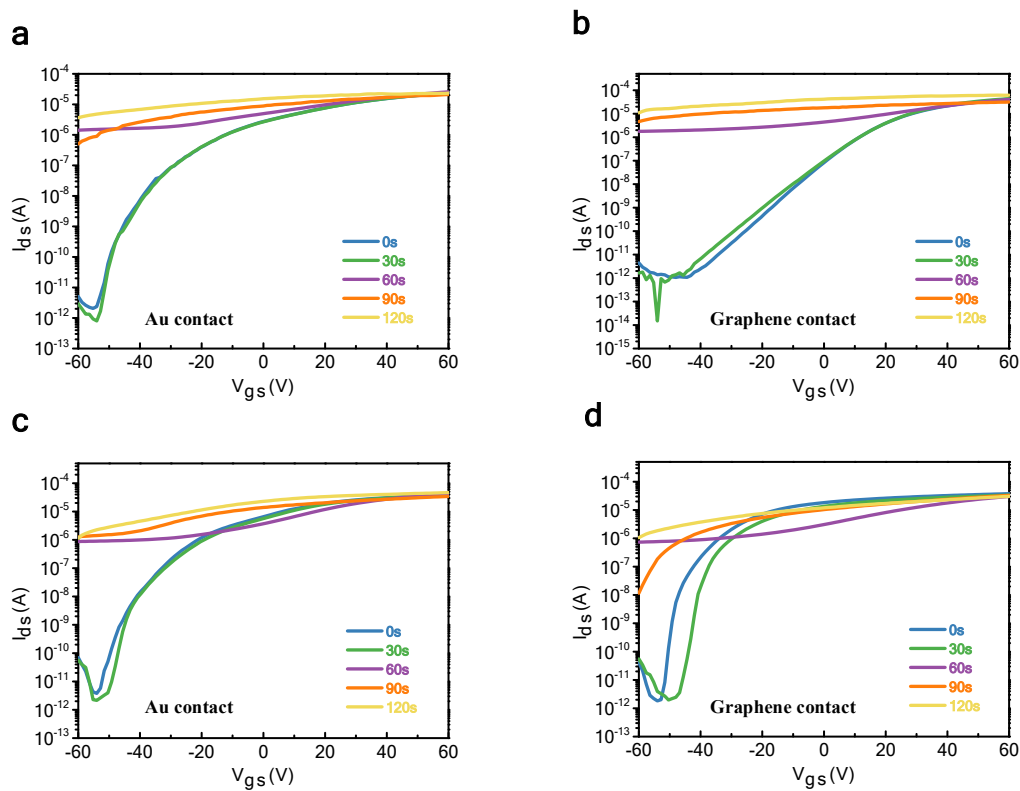

Figure S3: Transfer curve evolution of the MoS<sub>2</sub> FETs with Au (a) (c) and graphene (b) (d) as contacts under different plasma treatment times.

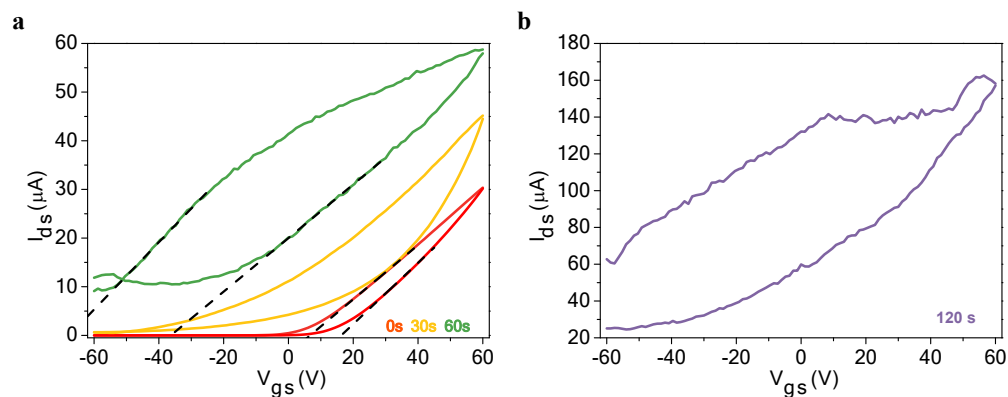

Figure S4: Transfer characteristics of pristine and N<sub>2</sub>O-doped MoS<sub>2</sub> FET with the V<sub>gs</sub> sweeping back and forth between -60 V and +60 V.

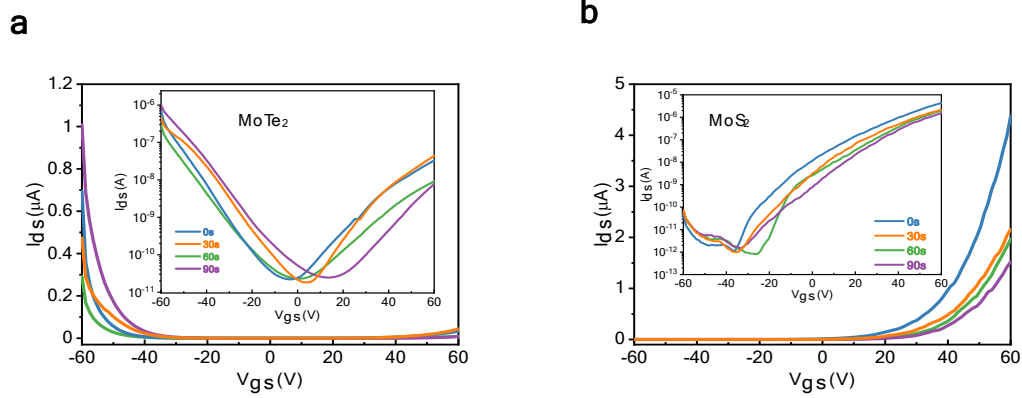

Figure S5: Transfer curves of the MoTe<sub>2</sub> FET (a) and MoS<sub>2</sub> (b) FET before and after consecutive O<sub>2</sub> plasma treatment with different exposure times.

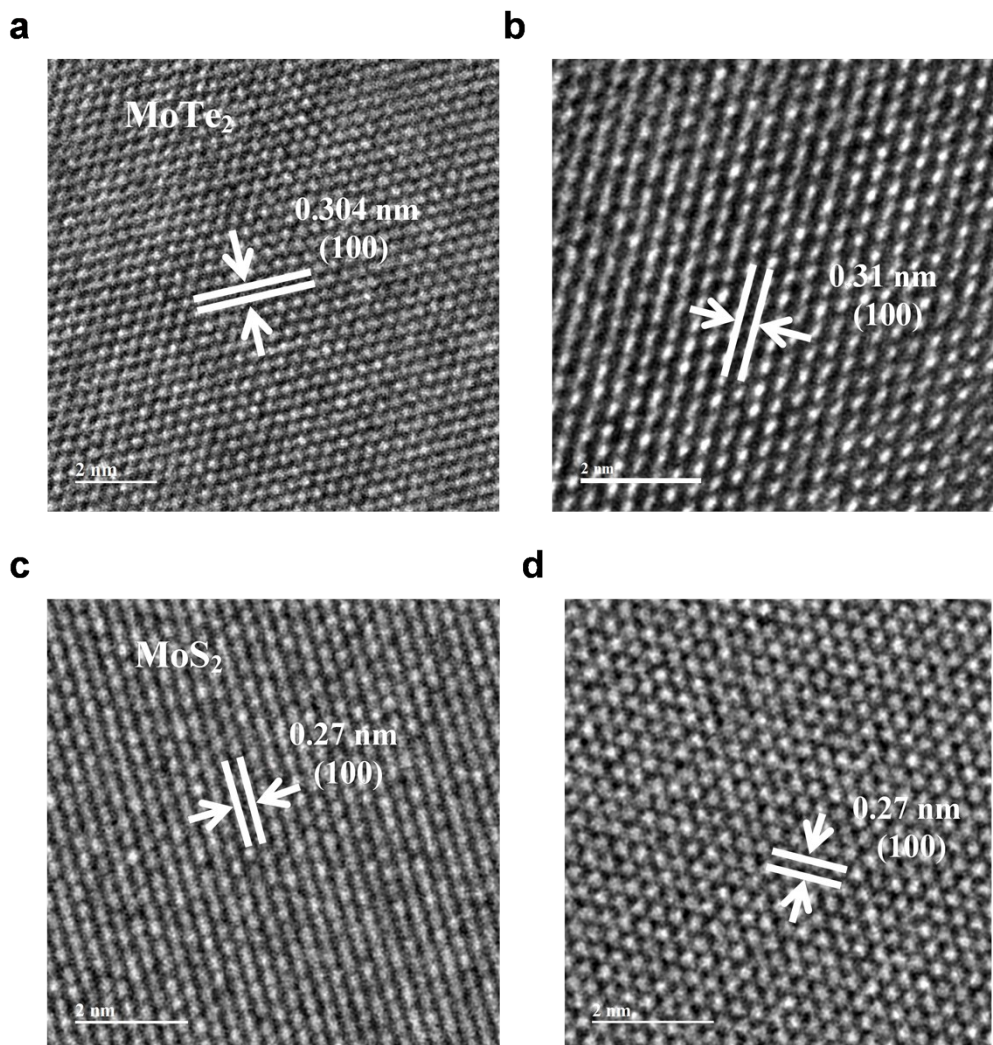

Figure S6: High-resolution TEM (HRTEM) images of MoTe<sub>2</sub> before (a) and after (b) plasma treatment. High-resolution TEM (HRTEM) images of MoS<sub>2</sub> before (c) and after (d) plasma treatment.

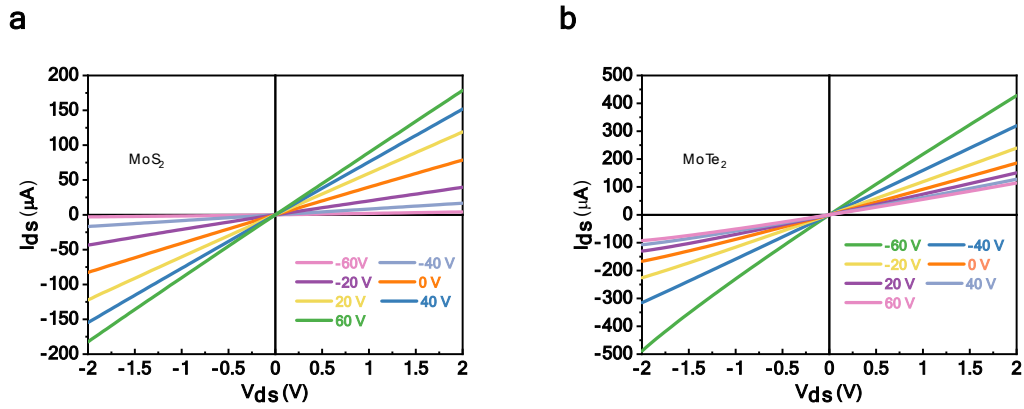

Figure S7: Output curves of the MoS<sub>2</sub> FET (a) and MoTe<sub>2</sub> FET (b) after N<sub>2</sub>O plasma treatment with different V<sub>gs</sub>.

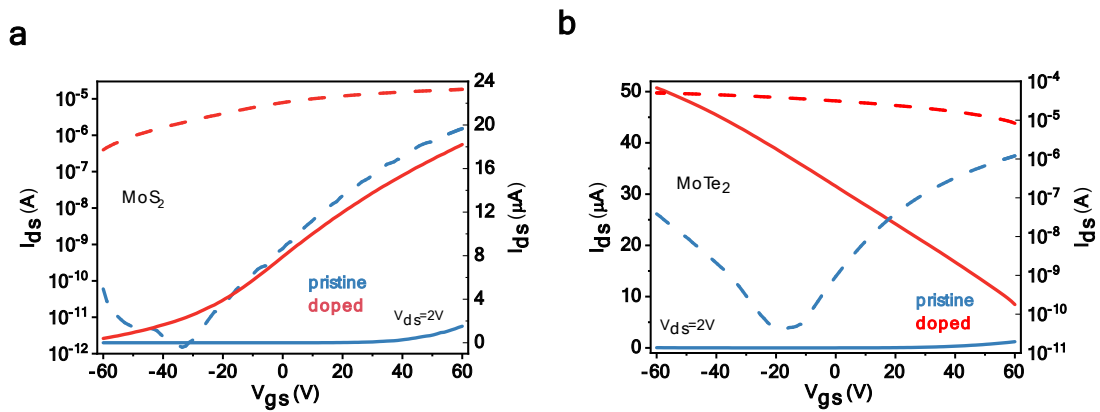

Figure S8: Transfer curves of the MoS<sub>2</sub> FET (a) and MoTe<sub>2</sub> FET (b) before and after N<sub>2</sub>O plasma treatment. V<sub>ds</sub>=2 V.

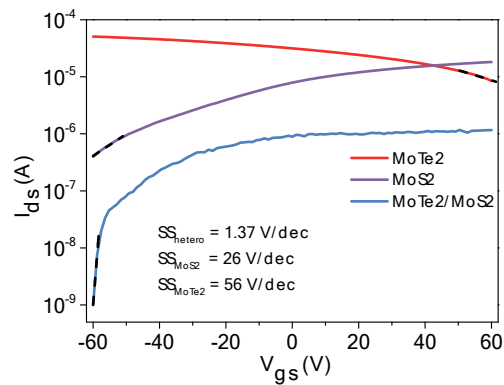

Figure S9: The values of subthreshold swings (SS) of MoTe<sub>2</sub>, MoS<sub>2</sub> and MoTe<sub>2</sub>/MoS<sub>2</sub> heterojunction, respectively.
